# Supplementary material for: Three-Layer PdO/CuWO4/CuO System for Hydrogen Gas Sensing with Reduced Humidity Interference
Source: MDPI journal article supplement (doi:10.3390/nano11123456), 2021-12-20
Supplement: s1 [file s1]

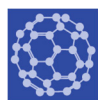

## Supplementary Material

# Three-Layer PdO/CuWO<sub>4</sub>/CuO System for Hydrogen Gas Sensing with Reduced Humidity Interference

Nirmal Kumar, Stanislav Haviar \* and Petr Zeman

Department of Physics and NTIS—European Centre of Excellence, Faculty of Applied Sciences, University of West Bohemia, Plzeň 301 00, Czech Republic; kumarn@kfy.zcu.cz (N.K.); zemanp@kfy.zcu.cz (P.Z.)

\* Correspondence: haviar@ntis.zcu.cz; Tel.: +420-377-632-220

**Table S1.** Baseline resistances of investigated sensing films.

| Specimen                                                 | Temperature | Dry Baseline Resistance | Humid Baseline Resistance |
|----------------------------------------------------------|-------------|-------------------------|---------------------------|
| <sup>20</sup> Cu–O                                       | 300 °C      | 0.3 MΩ                  | 0.3 MΩ                    |
| <sup>5</sup> W–O/ <sup>20</sup> Cu–O                     | 300 °C      | 0.5 MΩ                  | 2.0 MΩ                    |
| <sup>10</sup> W–O/ <sup>20</sup> Cu–O                    | 300 °C      | 0.7 MΩ                  | 1.5 MΩ                    |
| <sup>20</sup> W–O/ <sup>20</sup> Cu–O                    | 300 °C      | 1.3 MΩ                  | 2.4 MΩ                    |
| <sup>0.8</sup> Pd/ <sup>20</sup> Cu–O                    | 100 °C      | 0.8 GΩ                  | 1.2 GΩ                    |
| <sup>0.8</sup> Pd/ <sup>5</sup> W–O/ <sup>20</sup> Cu–O  | 100 °C      | 0.6 GΩ                  | 2.6 GΩ                    |
| <sup>0.8</sup> Pd/ <sup>10</sup> W–O/ <sup>20</sup> Cu–O | 100 °C      | 3.2 GΩ                  | 4.8 GΩ                    |
| <sup>0.8</sup> Pd/ <sup>20</sup> W–O/ <sup>20</sup> Cu–O | 100 °C      | 50 MΩ                   | 40 MΩ                     |

  

| Specimen                                                 | Humidity | Sensitivity Dry | Humid Baseline Resistance |
|----------------------------------------------------------|----------|-----------------|---------------------------|
| <sup>0.8</sup> Pd/ <sup>5</sup> W–O/ <sup>20</sup> Cu–O  | 0        | 3.33            | 5 GΩ                      |
|                                                          | 30       | 2.62            | 6 GΩ                      |
|                                                          | 60       | 2.24            | 4 GΩ                      |
|                                                          | 90       | 2.21            | 8 GΩ                      |
| <sup>0.8</sup> Pd/ <sup>20</sup> W–O/ <sup>20</sup> Cu–O | 0        | 4.39            | 44 MΩ                     |
|                                                          | 30       | 3.39            | 44 MΩ                     |
|                                                          | 60       | 1.68            | 46 MΩ                     |
|                                                          | 90       | 1.70            | 45 MΩ                     |
